# Supplementary material for: Characterization of solid magnetic nanoparticles by means of solid sampling high resolution continuum source electrothermal atomic absorption spectrometry
Source: Royal Society of Chemistry journal article supplement (doi:10.1039/c6ja00225k), 2016-01-01
Supplement: c6ja00225k1.pdf [file c6ja00225k1.pdf]

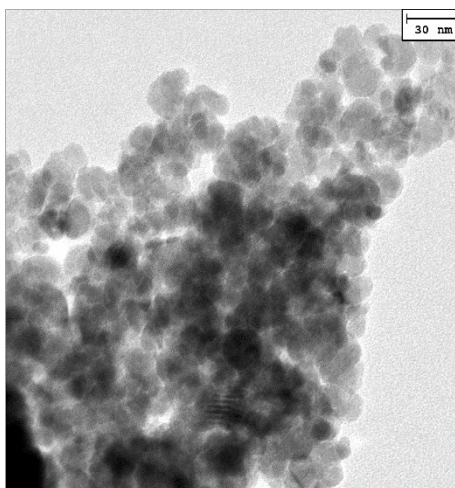

PSTH MNPs

Thin Apx  
 KAB Set : User, Elements

| Element | Weight % | Atomic % |
|---------|----------|----------|
| O K     | 32.5     | 62.2     |
| SiK     | 0.9      | 1.0      |
| S K     | 0.9      | 0.9      |
| FeK     | 65.6     | 35.9     |
| Total   | 100.0    | 100.0    |

| Element | Net Inte. | Bkqd Inte. | Inte. Error | P/B    |
|---------|-----------|------------|-------------|--------|
| O K     | 314.98    | 9.27       | 0.75        | 33.98  |
| SiK     | 16.36     | 14.22      | 5.27        | 1.15   |
| S K     | 17.44     | 12.16      | 4.78        | 1.43   |
| FeK     | 748.37    | 6.23       | 0.48        | 120.13 |

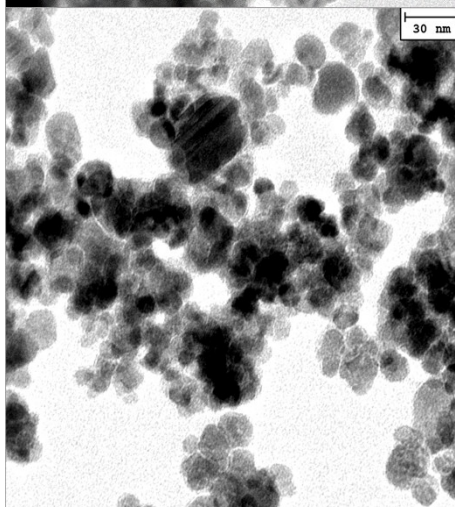

DPTH MNPs

Thin Apx  
 Theoretical KAB, Elements, Model : Mott/Massey

| Element | Weight % | Atomic % |
|---------|----------|----------|
| O K     | 41.7     | 71.1     |
| SiK     | 0.4      | 0.4      |
| S K     | 0.4      | 0.3      |
| FeK     | 57.5     | 28.1     |
| Total   | 100.0    | 100.0    |

| Element | Net Inte. | Bkqd Inte. | Inte. Error | P/B    |
|---------|-----------|------------|-------------|--------|
| O K     | 187.37    | 15.13      | 1.02        | 12.39  |
| SiK     | 4.52      | 8.16       | 13.05       | 0.55   |
| S K     | 4.17      | 7.31       | 13.43       | 0.57   |
| FeK     | 469.03    | 2.82       | 0.60        | 166.57 |
